# Supplementary material for: Covalent incorporation of tobacco mosaic virus increases the stiffness of poly(ethylene glycol) diacrylate hydrogels
Source: Royal Society of Chemistry journal article supplement (doi:10.1039/c7ra10364f), 2018-01-01
Supplement: c7ra10364f1.pdf [file c7ra10364f1.pdf]

Supporting Information for

## Covalent incorporation of tobacco mosaic virus increases the stiffness of poly(ethylene glycol) diacrylate hydrogels

A. Southan,<sup>\*a</sup> T. Lang,<sup>a</sup> M. Schweikert,<sup>b</sup> G. E.M. Tovar,<sup>a,c</sup> C. Wege,<sup>d</sup> S. Eiben,<sup>\*d</sup>

<sup>a</sup> Institute of Interfacial Process Engineering and Plasma Technology IGVP, University of Stuttgart, Nobelstr. 12, 70569 Stuttgart, Germany. Tel: +49 711 68568162; E-mail: alexander.southan@igvp.uni-stuttgart.de.

<sup>b</sup> Department of Biobased Materials, Institute of Biomaterials and Biomolecular Systems, University of Stuttgart, Pfaffenwaldring 57, 70569 Stuttgart, Germany.

<sup>c</sup> Fraunhofer Institute for Interfacial Engineering and Biotechnology IGB, Nobelstr. 12, 70569 Stuttgart, Germany.

<sup>d</sup> Department of Molecular Biology and Plant Virology, Institute of Biomaterials and Biomolecular Systems, University of Stuttgart, Pfaffenwaldring 57, 70569 Stuttgart, Germany; E-mail: sabine.eiben@bio.uni-stuttgart.de.

\* Corresponding authors

### Table of contents

|                                                                 |   |
|-----------------------------------------------------------------|---|
| 1. Rheology data of hydrogels.....                              | 2 |
| 1.1 PEG-DA hydrogels.....                                       | 2 |
| 1.2 TMV <sub>Cys</sub> containing hydrogels.....                | 3 |
| 1.3 wt-TMV containing hydrogels.....                            | 4 |
| 2. Photos of cured TMV containing hydrogels .....               | 5 |
| 3. Micro BCA calibration of wt-TMV and TMV <sub>Cys</sub> ..... | 5 |

# 1. Rheology data of hydrogels

## 1.1 PEG-DA hydrogels

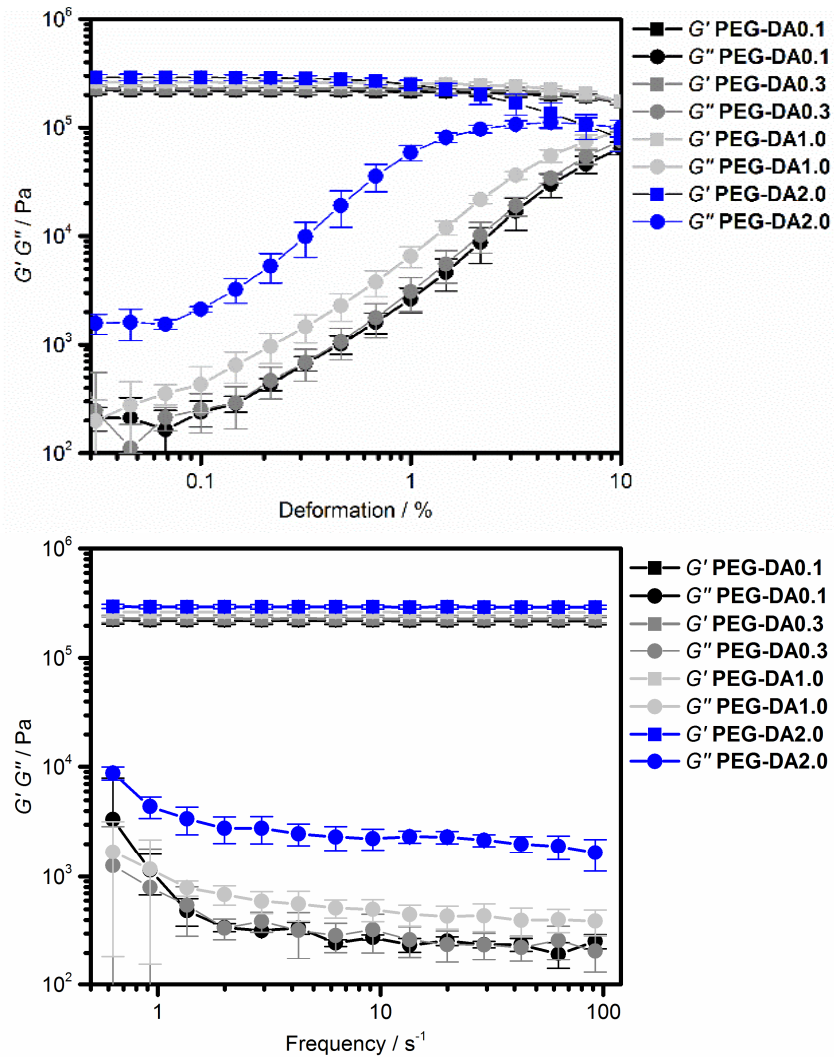

Figure 1 Amplitude sweep (top) and frequency sweep (bottom) of hydrogels prepared from PEG-DA without the addition of TMV particles.

## 1.2 TMV<sub>Cys</sub> containing hydrogels

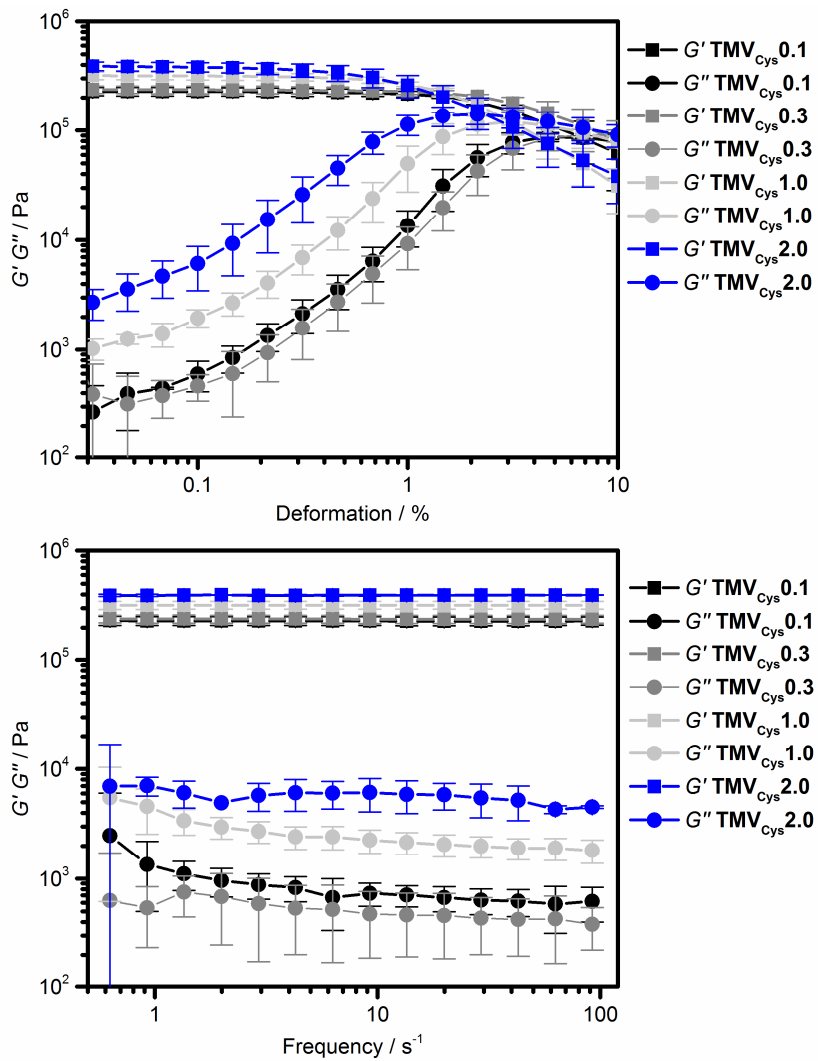

Figure 2 Amplitude sweep (top) and frequency sweep (bottom) of hydrogels prepared from PEG-DA with the addition of TMV<sub>Cys</sub>.

### 1.3 wt-TMV containing hydrogels

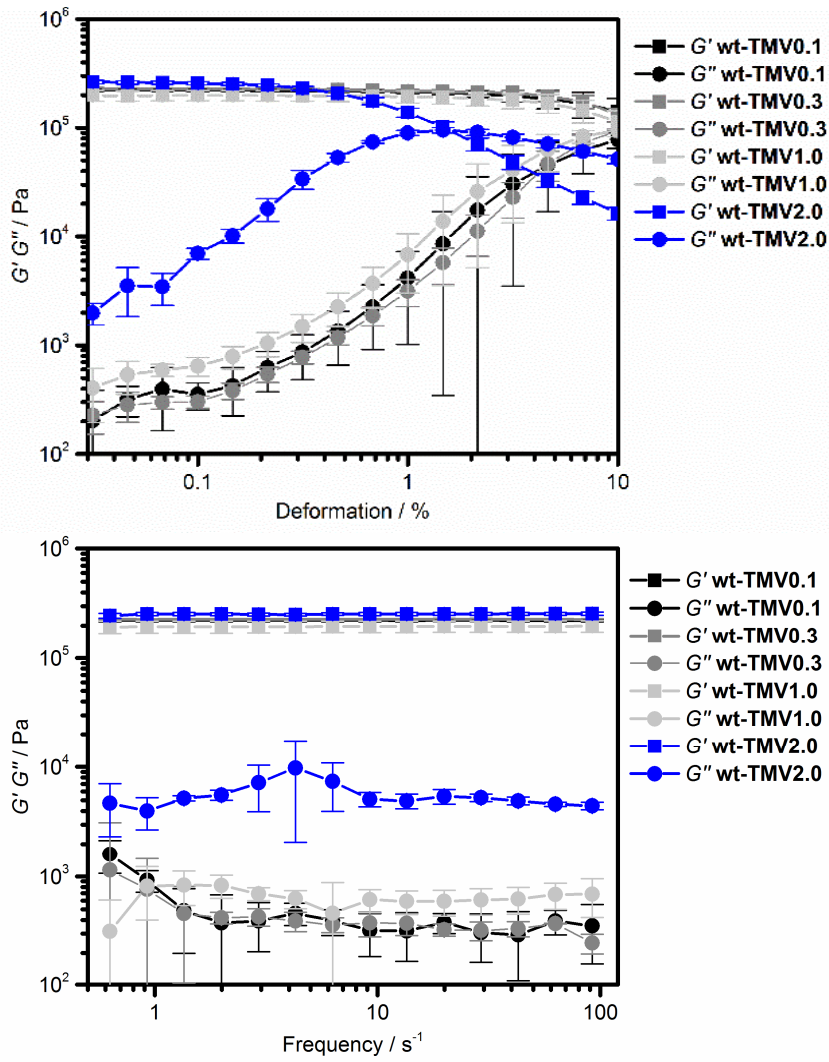

Figure 3 Amplitude sweep (top) and frequency sweep (bottom) of hydrogels prepared from PEG-DA with the addition of wt-TMV.

## 2. Photos of cured TMV containing hydrogels

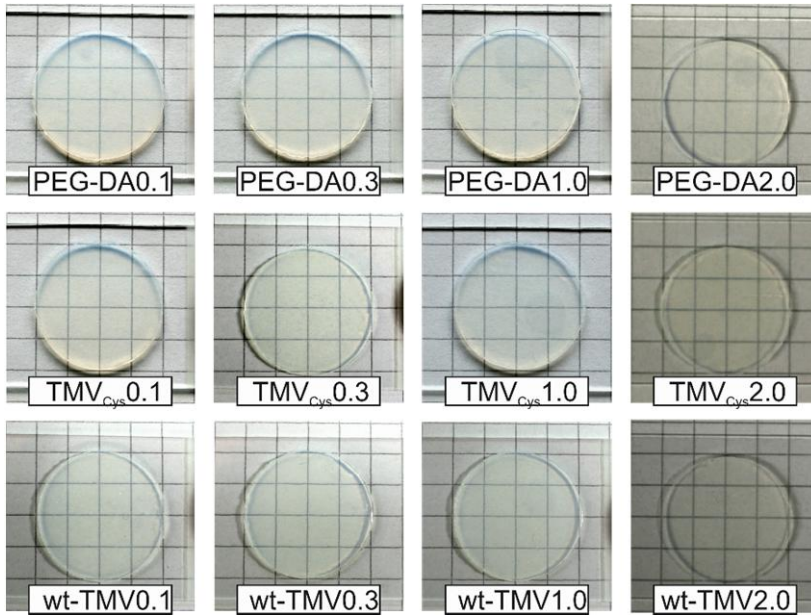

**Figure 4** Representative photos of PEG-DA hydrogels containing 0.1, 0.3, 1.0 or 2.0 wt. % of TMV<sub>Cys</sub>, wt-TMV or no TMV respectively. All hydrogels had a thickness of 1 mm and a diameter of 20 mm and were slightly opaque.

## 3. Micro BCA calibration of wt-TMV and TMV<sub>Cys</sub>

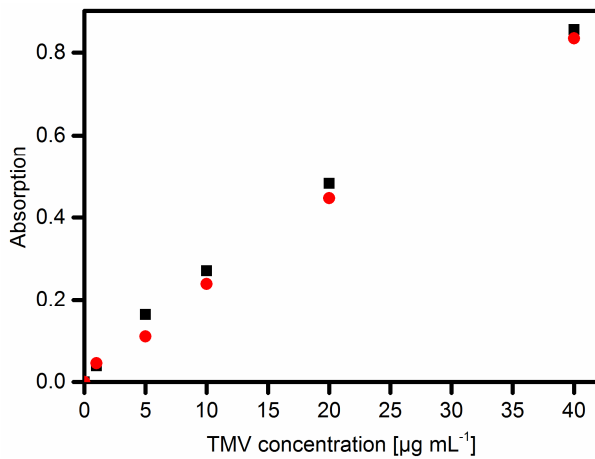

**Figure 5** Typical calibration measurements of wt-TMV (red circles) and TMV<sub>Cys</sub> (black squares) measured with the micro BCA assay in SPP buffer.
